# Supplementary material for: Functions of Protosilencers in the Formation and Maintenance of Heterochromatin in Saccharomyces cerevisiae
Source: PLoS One. 2012 May 17;7(5):e37092. doi: 10.1371/journal.pone.0037092 (PMC3355138; doi:10.1371/journal.pone.0037092)
Supplement: Table S1 — Yeast strains. (XLSX) [file pone.0037092.s003.xlsx]

## Sheet: Sheet1
Number	Name	Relevant genotype	Reference
	YXB5	ura3-52 ade2-1 lys1-1 his5-1 can1-100 [ciro] LEU2-GAL10-FLP1 E-FRT-hml::1-FRT-I	1
	YXB5s	YXB5, sir3::URA3	1
	YXB6	MATa ura3-52 ade2-1 lys1-1 his5-1 can1-100 [ciro] LEU2-GAL10-FLP1 E-FRT-hml::2-FRT-I	1
	YXB6s	YXB6, sir3::URA3	1
	YXB10	MATa ura3-52 ade2-1 lys1-1 his5-1 can1-100 [ciro] LEU2-GAL10-FLP1 FRT-E-hml::1-I-FRT	2
	YXB10s	YXB10, sir3::URA3	2
	YXB141	YXB10s, sir3-8-KanMX	3
	CCFY101	MATa ade2-1 can1-100 his3-11,15 leu2–3,112 trp1-289 ura3-1 hmre::TRP1 Tel VR-URA3 RDN1::ADE2-CAN1	4
	Y2047b	MATa HMRa HMLE79-113::SUP4-o-I242 LEU2-GAL10-FLP1 ura3-52 ade2-1 lys1-1his5-1 can1-100 [ciro]	5
1	YQY483	CCFY101, KanMX-HMR-E-hmr::TRP1-HMR-I
2	YYZ342	YQY483, sas2D::NatMX
3	YQY480	CCFY101, KanMX-HMR-EDA-hmr::TRP1-HMR-I
4	YYZ354	YQY480, sas2D::NatMX
5	YQY481	CCFY101, KanMX-HMR-EDO-hmr::TRP1-HMR-I
6	YYZ355	YQY481, sas2D::NatMX
7	YQY482	CCFY101, KanMX-HMR-EDR-hmr::TRP1-HMR-I
8	YYZ341	YQY482, sas2D::NatMX
9	YQY551	CCFY101, KanMX-HMR-E-hmr::TRP1-DHMR-I::HIS3
10	YYZ344	YQY551, sas2D::NatMX
11	YQY545	CCFY101, KanMX-HMR-EDA-hmr::TRP1-DHMR-I::HIS3
12	YYZ356	YQY545, sas2D::NatMX
13	YQY547	CCFY101, KanMX-HMR-EDO-hmr::TRP1-DHMR-I::HIS3
14	YYZ357	YQY547, sas2D::NatMX
15	YQY549	CCFY101, KanMX-HMR-EDR-hmr::TRP1-DHMR-I::HIS3
16	YYZ343	YQY549, sas2D::NatMX
17	YXZ01	YXB6, E-FRT-hml::b2-FRT-DI::HMR-E-URA3
17s	YXZ01s	YXZ01, sir3D::kanMX
17n	YXZ01n	YXB6, E-FRT-hml::b2-URA3-DI::HMR-E
18	YXZ02	YXB6, E-FRT-hml::b2-FRT-DI::ORC-BS-URA3
18s	YXZ02s	YXZ02, sir3D::kanMX
18n	YXZ02n	YXB6, E-FRT-hml::b2-URA3-DI::ORC-BS
19	YXZ03	YXB6, E-FRT-hml::b2-FRT-DI::Abf1-BS-URA3
19s	YXZ03s	YXZ03, sir3D::kanMX
19n	YXZ03n	YXB6, E-FRT-hml::b2-URA3-DI::Abf1-BS
20	YXZ04	YXB6, E-FRT-hml::b2-FRT-DI::Rap1-BS-URA3
20s	YXZ04s	YXZ04, sir3D::kanMX
20n	YXZ04n	YXB6, E-FRT-hml::b2-URA3-DI::Rap1-BS
21	YXZ05	YXB6, E-FRT-hml::b2-FRT-DI::hmr-e*-URA3
21s	YXZ05s	YXZ05, sir3D::kanMX
21n	YXZ05n	YXB6, E-FRT-hml::b2-URA3-DI::hmr-e
22	YXZ06	YXB6, E-FRT-hml::b2-FRT-DI::2xAbf1-BS-URA3
22n	YXZ06n	YXB6, E-FRT-hml::b2-URA3-DI::2xAbf1-BS
23	YXZ07	YXB6, E-FRT-hml::b2-FRT-DI::3xAbf1-BS-URA3
23n	YXZ07n	YXB6, E-FRT-hml::b2-URA3-DI::3xAbf1-BS
24	YXB125	MATa ura3-52 ade2-1 lys1-1 his5-1 can1-100 [ciro] LEU2-GAL10-FLP1 E-FRT-hml::1::ARS1-FRT-I
24s	YXB125s	YXB125, sir3::URA3
25	Y2786	MATa ura3 his3 ade2 can1 trp1 his5 LEU2-GAL10-FLP1 hhf1::HIS3 hhf2::LEU2 E-FRT-hml::1::(HMR-E)-FRT-I
		sir3::URA3 sir3-8-KanMX [ciro]+ p(CEN-TRP1-HHF1)
26	YXB142	YXB5s, sir3-8-KanMX
27	YXB126	YXB125s, sir3-8-KanMX
		*hmr-e represents a mutant HMR-E silencer lacking the ORC-, Rap1- and Abf1-binding sites.
	Ref. 1	Bi X, Broach JR (1997) DNA in transcriptionally silent chromatin assumes a distinct topology that is sensitive to cell cycle
		progression. Mol Cell Biol 17: 7077-7087.
	Ref. 2	Bi X, Yu Q, Sandmeier JJ, Elizondo S (2004) Regulation of transcriptional silencing in yeast by growth temperature. J Mol
		Biol 344: 893-905.
	Ref. 3	Yu Q, Zhang X, Bi X (2011) Roles of chromatin remodeling factors in the formation and maintenance of heterochromatin
		structure. J Biol Chem 286:14659-14669.
	Ref. 4	Roy N, Runge KW (2000) Two paralogs involved in transcriptional silencing that antagonistically control yeast life span.
		Curr Biol 10: 111–114
	Ref. 5	Holmes, SG, Broach, JR (1996) Silencers are required for inheritance of the repressed state in yeast. Genes Dev 10:
		1021-1032.
